# Supplementary material for: What Works in Community-Led Suicide Prevention: Perspectives of Wesley LifeForce Network Coordinators
Source: MDPI journal article supplement (doi:10.3390/ijerph18116084), 2021-06-04
Supplement: s1 [file s1]

## Supplementary Material S1: Survey tool

### \* Introduction page \*

Thank you for participating in this survey.

<PLS and Consent form>

### \* Part 1: Information about the Network and the person completing this survey \*

***First, we are going to ask you some questions about your Network.***

Q1: What is the name of your Network?

Q2: Where is your Network based?

State (dropdown)

Q3 What is the postcode of your Network location?

Postcode: \_\_\_\_ \_\_\_\_ \_\_\_\_ \_\_\_\_

Q4: In what year did the Network receive Wesley seed-funding?

Year: \_\_\_\_ \_\_\_\_ \_\_\_\_ \_\_\_\_

Don't know ☐

Q5: Since inception, has the Network received any additional funding, other than the seed funding from Wesley?

- ☐ Yes → go to Q6
- ☐ No → go to Q7
- ☐ Don't know → go to Q7

Q6: If yes, how much additional funding was received?

- ☐ 1 to 5,000 AUD
- ☐ 5,001 to 10,000 AUD
- ☐ 10,001 to 20,000 AUD
- ☐ Over 20,000 AUD

Q7: What type of funding sources? *(Please tick all applicable options.)*

- ☐ Donations
- ☐ Grants (such as Rotary or Beyond Blue)
- ☐ State/federal funding (including PHN funding)
- ☐ Fundraising events or activities
- ☐ Other (please specify) \_\_\_\_\_

Q8: Approximately, how many individual members does the Network currently have?

Number: \_\_\_\_ \_\_\_\_

Q9: How many organisations, services or community groups are members of your Network?

Number: \_\_\_\_ \_\_\_\_

Q10: How many of the individual Network members are volunteers?

Number: \_\_\_\_ \_\_\_\_

Q11: How many of the individual Network members participate in the Network as part of their professional role/employment?

Number: \_\_\_\_ \_\_\_\_

Q12: To your knowledge, do any of the Network members have a lived experience of suicide?

*By lived experience we mean people who have experienced suicidal thoughts, survived a suicide attempt, cared for someone going through a suicidal crisis, or have lost someone to suicide.*

- ☐ Yes → go to Q12a
- ☐ No → go to Q13
- ☐ Don't know → go to Q13

Q12a: Approximately, how many Network members have a lived experience of suicide?

Number: \_\_\_\_\_ ☐ Don't know

Q13: What is the primary focus of your Network? *(please select only one)*

- ☐ General
- ☐ Youth
- ☐ LGBTIQ
- ☐ Indigenous
- ☐ CALD
- ☐ Industry
- ☐ Other, specify \_\_\_\_\_

Q13a: Does your Network have another / secondary focus *(If so, please briefly describe below)*

Q14: Approximately, how many times has your Network met over the past 12 months? *(If you have not met in the last 12 months, enter '0')*

Number: \_\_\_\_ \_\_\_\_

***The next questions are about you and your role in the Network.***

Q15: What is your role in the Network?

- ☐ Chair/President
- ☐ Secretary
- ☐ Treasurer
- ☐ Project officer
- ☐ Member
- ☐ Other, specify \_\_\_\_\_

Q16: Is your participation in the Network part of your professional role/employment or are you involved on a volunteer basis?

- ☐ Part of my professional job → go to Q17
- ☐ Involved on a voluntary basis → go to Q18
- ☐ Both as part of my professional job and as a volunteer → go to Q17

Q17: Please describe your professional role/employment of relevance to the Network.

\_\_\_\_\_

Q18: How many hours on average do you typically contribute to the Network per week?

Average Hours (per week): \_\_\_\_

Q19: Do you identify as having a lived experience of suicide?

*By lived experience we mean people who have experienced suicidal thoughts, survived a suicide attempt, cared for someone going through a suicidal crisis, or have lost someone to suicide.*

- ☐ Yes → go to Q20
- ☐ No → go to Q21
- ☐ Would rather not say → go to Q21

Q20: In what way do you identify as having a lived experience of suicide? *(please tick all that apply)*

- ☐ I have experienced suicidal thoughts
- ☐ I have survived a suicide attempt
- ☐ I have cared for someone through suicidal crisis
- ☐ I am bereaved by suicide

Q21: How long have you been involved with this Network? *(please move the slider)*

Number of Years (slider)

Q22: What has motivated you to join the Network? *(Please choose the main reason)*

- ☐ My lived experience of suicide
- ☐ I saw a need in the community and wanted to help create change
- ☐ My professional interest
- ☐ Other, please specify: \_\_\_\_\_

Q23: What is your age group?

- ☐ 18-19 years
- ☐ 20 to 29 years
- ☐ 30 to 39 years
- ☐ 40 to 49 years
- ☐ 50 to 59 years
- ☐ 60 to 69 years
- ☐ 70 to 79 years
- ☐ 80+ years

Q24: Do you identify as... ?

- ☐ Male
- ☐ Female
- ☐ Transgender male/female
- ☐ Non-binary/gender queer
- ☐ Different identity not listed here
- ☐ Prefer not to say

Q25: Are you of Aboriginal or Torres Strait Islander origin?

- ☐ No
- ☐ Yes, Aboriginal
- ☐ Yes, Torres Strait Islander
- ☐ Yes, both

**\* Part 2: Internal Network processes and outcomes \***

***The following questions are about the internal processes and operations of your Network. These are things the Network does internally rather than what they are doing externally with the community. We are interested in the internal activities of the Network and any outcomes of these.***

Q26: Which of the following internal processes and operations has your Network done in either the last 12 months and/or more than 12 months ago?

*If you are uncertain, or have not focused on these aspects before, please choose “Never” or “Not sure”.*

|                                                                                                       | In the past 12 months    | More than 12 months ago  | Never                    | Not sure                 |
|-------------------------------------------------------------------------------------------------------|--------------------------|--------------------------|--------------------------|--------------------------|
| a. Identifying suicide prevention issues in the community                                             | <input type="checkbox"/> | <input type="checkbox"/> | <input type="checkbox"/> | <input type="checkbox"/> |
| b. Identifying available suicide prevention frameworks                                                | <input type="checkbox"/> | <input type="checkbox"/> | <input type="checkbox"/> | <input type="checkbox"/> |
| c. Identifying relevant community stakeholders                                                        | <input type="checkbox"/> | <input type="checkbox"/> | <input type="checkbox"/> | <input type="checkbox"/> |
| d. Identifying gaps in community knowledge on suicide                                                 | <input type="checkbox"/> | <input type="checkbox"/> | <input type="checkbox"/> | <input type="checkbox"/> |
| e. Identifying local service arrangements and referral pathways                                       | <input type="checkbox"/> | <input type="checkbox"/> | <input type="checkbox"/> | <input type="checkbox"/> |
| f. Identifying local service needs and gaps, and existing barriers to service access and help-seeking | <input type="checkbox"/> | <input type="checkbox"/> | <input type="checkbox"/> | <input type="checkbox"/> |
| g. Identifying gaps in suicide prevention efforts                                                     | <input type="checkbox"/> | <input type="checkbox"/> | <input type="checkbox"/> | <input type="checkbox"/> |
| h. Training and capacity building of Network members                                                  | <input type="checkbox"/> | <input type="checkbox"/> | <input type="checkbox"/> | <input type="checkbox"/> |
| i. Participating in strategic planning to determine future Network directions and activities          | <input type="checkbox"/> | <input type="checkbox"/> | <input type="checkbox"/> | <input type="checkbox"/> |

Q27: Apart from those listed above, are there any other internal processes and operations that your Network is or has been doing? Please briefly list them here:

Open text: \_\_\_\_\_

***The following statements refer to potential outcomes of your internal Network processes and operations for Network members.***

Q28: As an outcome of our internal Network processes and operations, Network members now have a better understanding of the following:

Please indicate to what extent you agree to the statements below.

|                                                     | Strongly disagree (1)    | Dis-agree (2)            | Neutral (3)              | Agree (4)                | Strongly agree (5)       |
|-----------------------------------------------------|--------------------------|--------------------------|--------------------------|--------------------------|--------------------------|
| a. Key suicide prevention issues in the community   | <input type="checkbox"/> |
| b. Existing suicide prevention frameworks           | <input type="checkbox"/> |
| c. Local service arrangements and referral pathways | <input type="checkbox"/> |
| d. Gaps in community knowledge regarding suicide    | <input type="checkbox"/> |
| e. Local service needs and gaps                     | <input type="checkbox"/> |
| f. Gaps in suicide prevention efforts               | <input type="checkbox"/> |
| g. Help-seeking barriers and facilitators           | <input type="checkbox"/> |
| h. Service access barriers and facilitators         | <input type="checkbox"/> |

Q29: As an outcome of our internal Network processes and operations, Network members now have increased confidence and capacity to do the following:

Please indicate to what extent you agree to the statements below.

|                                                                  | Strongly disagree (1)    | Dis-agree (2)            | Neutral (3)              | Agree (4)                | Strongly agree (5)       |
|------------------------------------------------------------------|--------------------------|--------------------------|--------------------------|--------------------------|--------------------------|
| a. Collaboratively plan and develop network-initiated strategies | <input type="checkbox"/> |
| b. Plan initiatives to address knowledge gaps                    | <input type="checkbox"/> |
| c. Plan initiatives to address service gaps and access issues    | <input type="checkbox"/> |
| d. Plan initiatives to encourage help-seeking                    | <input type="checkbox"/> |
| e. Plan initiatives to strengthen community responses            | <input type="checkbox"/> |
| f. Plan initiatives to enhance service responses                 | <input type="checkbox"/> |
| g. Evaluate network initiatives                                  | <input type="checkbox"/> |

**\* Part 3: External Network activities and outcomes \***

***The following questions are about the community focused activities and outcomes of your Network. These are things the Network does externally with the community.***

Q30: Which of the following community focused activities has your Network done in either the last 12 months and/or more than 12 months ago?

*If you are uncertain, or have not focused on these aspects before, please choose "Never" or "Not sure".*

|                                                                                                                 | In the past 12 months    | More than 12 months ago  | Never                    | Not sure                 |
|-----------------------------------------------------------------------------------------------------------------|--------------------------|--------------------------|--------------------------|--------------------------|
| a. Distributing local support service contact information                                                       | <input type="checkbox"/> | <input type="checkbox"/> | <input type="checkbox"/> | <input type="checkbox"/> |
| b. Facilitating community suicide awareness and stigma reduction initiatives                                    | <input type="checkbox"/> | <input type="checkbox"/> | <input type="checkbox"/> | <input type="checkbox"/> |
| c. Initiating suicide prevention activities that address needs of diverse populations and service gaps          | <input type="checkbox"/> | <input type="checkbox"/> | <input type="checkbox"/> | <input type="checkbox"/> |
| d. Facilitating bereavement support and postvention activities                                                  | <input type="checkbox"/> | <input type="checkbox"/> | <input type="checkbox"/> | <input type="checkbox"/> |
| e. Fostering recognition and capacity of lived experience in suicide prevention                                 | <input type="checkbox"/> | <input type="checkbox"/> | <input type="checkbox"/> | <input type="checkbox"/> |
| f. Facilitating access to suicide prevention training                                                           | <input type="checkbox"/> | <input type="checkbox"/> | <input type="checkbox"/> | <input type="checkbox"/> |
| g. Supporting services to build their capacity in identifying, responding to and assisting suicidal people      | <input type="checkbox"/> | <input type="checkbox"/> | <input type="checkbox"/> | <input type="checkbox"/> |
| h. Facilitating community access to support services                                                            | <input type="checkbox"/> | <input type="checkbox"/> | <input type="checkbox"/> | <input type="checkbox"/> |
| i. Advocating and promoting responsive service policies, proactive guidelines and appropriate referral pathways | <input type="checkbox"/> | <input type="checkbox"/> | <input type="checkbox"/> | <input type="checkbox"/> |

Q31: Apart from those listed above, are there any other key community focused activities your Network is or has been doing? Please briefly list them here:

Open text: \_\_\_\_\_

***The following statements refer to potential outcomes of your community focused activities.***

Q32: As an outcome of the Network's community focused activities, the community now has:

*Please indicate to what extent you agree to the statements below.*

|                                                                      | Strongly disagree<br>(1) | Dis-agree<br>(2)         | Neutral<br>(3)           | Agree<br>(4)             | Strongly agree (5)       |
|----------------------------------------------------------------------|--------------------------|--------------------------|--------------------------|--------------------------|--------------------------|
| a. Increased knowledge about support services and their linkages     | <input type="checkbox"/> |
| b. Improved awareness of suicide prevention services/strategies      | <input type="checkbox"/> |
| c. Increased confidence in assisting people at risk of suicide       | <input type="checkbox"/> |
| d. Increased capacity to respond and help someone at risk of suicide | <input type="checkbox"/> |

Q33: As an outcome of the Network's community focused activities, service providers now have:

*Please indicate to what extent you agree to the statements below.*

|                                                                           | Strongly disagree<br>(1) | Dis-agree<br>(2)         | Neutral<br>(3)           | Agree<br>(4)             | Strongly agree (5)       |
|---------------------------------------------------------------------------|--------------------------|--------------------------|--------------------------|--------------------------|--------------------------|
| a. Improved awareness of suicide prevention services/strategies           | <input type="checkbox"/> |
| b. Increased confidence in assisting people at risk of suicide            | <input type="checkbox"/> |
| c. Increased capacity to respond and help someone at risk of suicide      | <input type="checkbox"/> |
| d. Included people with lived experience in suicide prevention activities | <input type="checkbox"/> |
| e. Improved service linkages and access pathways                          | <input type="checkbox"/> |

Q34: As an outcome of the Network's community focused activities, people at risk of suicide:

*Please indicate to what extent you agree to the statements below.*

|                                                                                  | Strongly disagree<br>(1) | Dis-agree<br>(2)         | Neutral<br>(3)           | Agree<br>(4)             | Strongly agree (5)       |
|----------------------------------------------------------------------------------|--------------------------|--------------------------|--------------------------|--------------------------|--------------------------|
| a. Experience less stigma in the community                                       | <input type="checkbox"/> |
| b. Are identified early                                                          | <input type="checkbox"/> |
| c. Receive appropriate support and referral to relevant support services         | <input type="checkbox"/> |
| d. Demonstrate increased help-seeking behaviour and uptake of available services | <input type="checkbox"/> |
| e. Are supported by people in the community                                      | <input type="checkbox"/> |



Q35: Overall, since the Network began, we have seen the following outcomes:

*Please indicate to what extent you agree to the statements below.*

|                                                                    | Strongly disagree (1)    | Dis-agree (2)            | Neutral (3)              | Agree (4)                | Strongly agree (5)       |
|--------------------------------------------------------------------|--------------------------|--------------------------|--------------------------|--------------------------|--------------------------|
| a. Suicide risk in the community has been reduced                  | <input type="checkbox"/> |
| b. The coordination of suicide prevention efforts has improved     | <input type="checkbox"/> |
| c. Suicide prevention efforts follow a whole of community approach | <input type="checkbox"/> |
| d. Community wellbeing has improved                                | <input type="checkbox"/> |

**\* Part 4: And a few last questions \***

**In this final section we would like to learn more about what factors helped the Network to achieve its outcomes and if there were any barriers to effective network functioning.**

Q36: What were the key factors (if any) that helped your Network function efficiently and achieve its outcomes? Please briefly describe the main three facilitators.

Open text: \_\_\_\_\_

Q37: What were the key barriers (if any) that inhibited the Network from functioning efficiently and achieve its outcomes? Please briefly describe the main three barriers.

Open text: \_\_\_\_\_

Q38: For the future, what is needed for the Network to continue to work successfully?

Open text: \_\_\_\_\_

Q39: Has being part of this Network made a difference to your life?

- ☐ Yes → go to Q40
- ☐ No → go to Q41
- ☐ Don't know → go to Q41

Q40: If yes, can you briefly describe what has changed for you.

Open text: \_\_\_\_\_

Q41: Is there anything else that you would like to share with us?

For example, have we missed any other outcomes that you have observed in your community; or were there any unintended outcomes or unforeseen consequences (positive or negative) of the Network initiatives?

Open text: \_\_\_\_\_

**Thank you very much for completing this survey. The information you have provided will be very useful in understanding the breadth and depth of Wesley Network activities and outcomes.**

☐ Submit survey

Administration notes: Last page will show the confirmation of survey submission and list contact details of project team.

## Supplementary Material S2: Profiles of invited, responding and non-responding networks

|             | Invited<br>(N=92) |       | Responding<br>(N=41) |       | Nonresponding<br>(N=51) |       |
|-------------|-------------------|-------|----------------------|-------|-------------------------|-------|
| Status      | n                 | %     | n                    | %     | n                       | %     |
| Incubating  | 10                | 10.87 | 4                    | 9.76  | 6                       | 11.76 |
| Sustainable | 82                | 89.13 | 37                   | 90.24 | 45                      | 88.24 |
|             |                   |       |                      |       |                         |       |
| Focus       |                   |       |                      |       |                         |       |
| Indigenous  | 19                | 20.65 | 5                    | 12.20 | 14                      | 27.45 |
| General     | 65                | 70.65 | 34                   | 82.93 | 34                      | 66.67 |
| Other       | 8                 | 8.70  | 2                    | 4.88  | 3                       | 5.88  |
|             |                   |       |                      |       |                         |       |
| State       |                   |       |                      |       |                         |       |
| NSW         | 28                | 30.43 | 12                   | 29.27 | 16                      | 31.37 |
| Qld         | 21                | 22.83 | 9                    | 21.95 | 12                      | 23.53 |
| Vic         | 14                | 15.22 | 9                    | 21.95 | 5                       | 9.80  |
| WA          | 10                | 10.87 | 4                    | 9.76  | 6                       | 11.76 |
| SA          | 8                 | 8.70  | 1                    | 2.44  | 7                       | 13.73 |
| NT          | 7                 | 7.61  | 3                    | 7.32  | 4                       | 7.84  |
| Tas         | 3                 | 3.26  | 3                    | 7.32  | 0                       | 0.00  |
| ACT         | 1                 | 1.09  | 0                    | 0.00  | 1                       | 1.96  |
|             |                   |       |                      |       |                         |       |
| Rurality    |                   |       |                      |       |                         |       |
| Regional    | 42                | 45.65 | 18                   | 43.90 | 24                      | 47.06 |
| Major city  | 28                | 30.43 | 13                   | 31.71 | 15                      | 29.41 |
| Remote      | 22                | 23.91 | 10                   | 24.39 | 12                      | 23.53 |

Note. Of 47 unique survey responses received (response rate 51.1%), 41 contained sufficient data to be included in analysis (response rate 44.6%).
